# Supplementary material
Source: publisher figshare collection journal article supplement (https://frontiersin.figshare.com/ndownloader/files/21769530)
Supplement: Supplementary file 1 [file 21769530]

# 1 Supplementary Material

## Tomographic Imaging of Agung Volcano Complex, Bali Indonesia from Ambient Seismic Noise Field

2 **Zulfakriza Zulfakriza<sup>1\*</sup>, Andri Dian Nugraha<sup>1</sup>, Sri Widiyantoro<sup>1</sup>, Phil R Cummins<sup>2</sup>, David P**  
 3 **Sahara<sup>1</sup>, Shindy Rosalia<sup>1</sup>, Awali Priyono<sup>1</sup>, Kasbani<sup>3</sup>, Devy Kamil Syahbana<sup>3</sup>, Imam Catur**  
 4 **Priambodo<sup>3</sup>, Martanto<sup>3</sup>, Ardianto<sup>4</sup>, Yayan M Husni<sup>4</sup>, Aditya Permana<sup>4</sup>, Dian Kusumawati<sup>4</sup>,**  
 5 **Billy S Prabowo<sup>4</sup>**

6 <sup>1</sup>Geophysics Research Group, Faculty of Mining and Petroleum Engineering, Bandung Institute of  
 7 Technology, Bandung, Indonesia.

8 <sup>2</sup>Research School of Earth Sciences, Australian National University, Canberra, Australia

9 <sup>3</sup>Center for Volcanology and Geological Hazards Mitigation, Geological Agency, Ministry of energy  
 10 and Mineral Resources, Bandung, Indonesia

11 <sup>4</sup>Volcanology and Geothermal Laboratory, Faculty of Mining and Petroleum Engineering, Bandung  
 12 Institute of Technology, Bandung, Indonesia.

13 **\* Correspondence:**  
 14 Corresponding Author  
 15 zulfakriza@itb.ac.id

16

17 **Supplementary Table S1:** Table of Agung Seismic Experiment station location

18

| No. | ID   | Type | Position  |          |               |
|-----|------|------|-----------|----------|---------------|
|     |      |      | Longitude | Latitude | Elevation (m) |
| 1   | PE12 | BB   | 115.19727 | -8.12849 | 290           |
| 2   | PE20 | BB   | 115.32890 | -8.20799 | 1720          |
| 3   | PE19 | BB   | 115.24218 | -8.30233 | 957           |
| 4   | PE14 | BB   | 115.14085 | -8.20101 | 787           |
| 5   | PE21 | BB   | 115.36960 | -8.45750 | 446           |
| 6   | PE15 | BB   | 115.34370 | -8.41220 | 618           |
| 7   | PE17 | BB   | 115.34020 | -8.32270 | 47            |
| 8   | PE22 | BB   | 115.40589 | -8.15949 | 111           |
| 9   | PE11 | BB   | 115.28957 | -8.39978 | 593           |
| 10  | PE13 | BB   | 115.45629 | -8.29107 | 1084          |
| 11  | PE16 | BB   | 115.48847 | -8.26896 | 534           |
| 12  | PE18 | BB   | 115.25914 | -8.36928 | 668           |

|    |      |    |           |           |      |
|----|------|----|-----------|-----------|------|
| 13 | PE26 | BB | 115.37858 | -8.287528 | 1334 |
| 14 | PE05 | BB | 115.48990 | -8.235720 | 210  |
| 15 | PE09 | BB | 115.42996 | -8.504852 | 246  |
| 16 | PE08 | BB | 115.40191 | -8.322610 | 1078 |
| 17 | PE04 | BB | 115.49808 | -8.485047 | 321  |
| 18 | PE07 | BB | 115.52848 | -8.242650 | 168  |
| 19 | PE27 | BB | 115.61128 | -8.365279 | 178  |
| 20 | PE23 | SP | 115.44858 | -8.208710 | 434  |
| 21 | PE24 | SP | 115.56742 | -8.288802 | 308  |
| 22 | PE25 | SP | 115.61543 | -8.422544 | 311  |
| 23 | PE03 | BH | 115.43127 | -8.381010 | 748  |
| 24 | PE02 | BH | 115.43180 | -8.424720 | 540  |
| 25 | PE01 | BH | 115.51141 | -8.391482 | 1014 |

Supplementary Figures

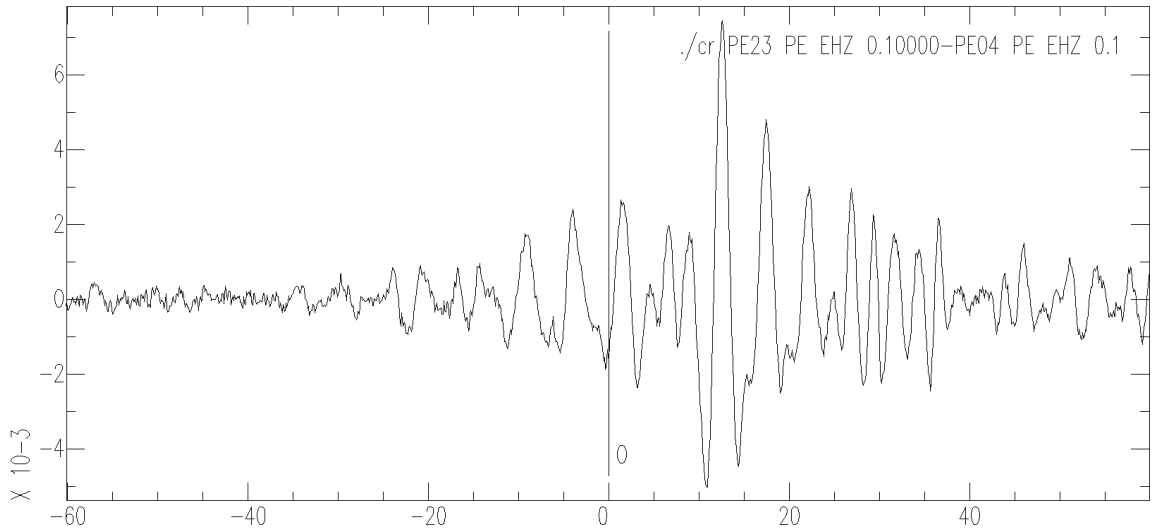

**Supplementary Figure S1:** Sample of cross-correlation between short-period seismometer (PE23) and broad-band seismometer (PE04) after instrument response corrected. The Green’s Function can be estimated from the cross-correlation result.

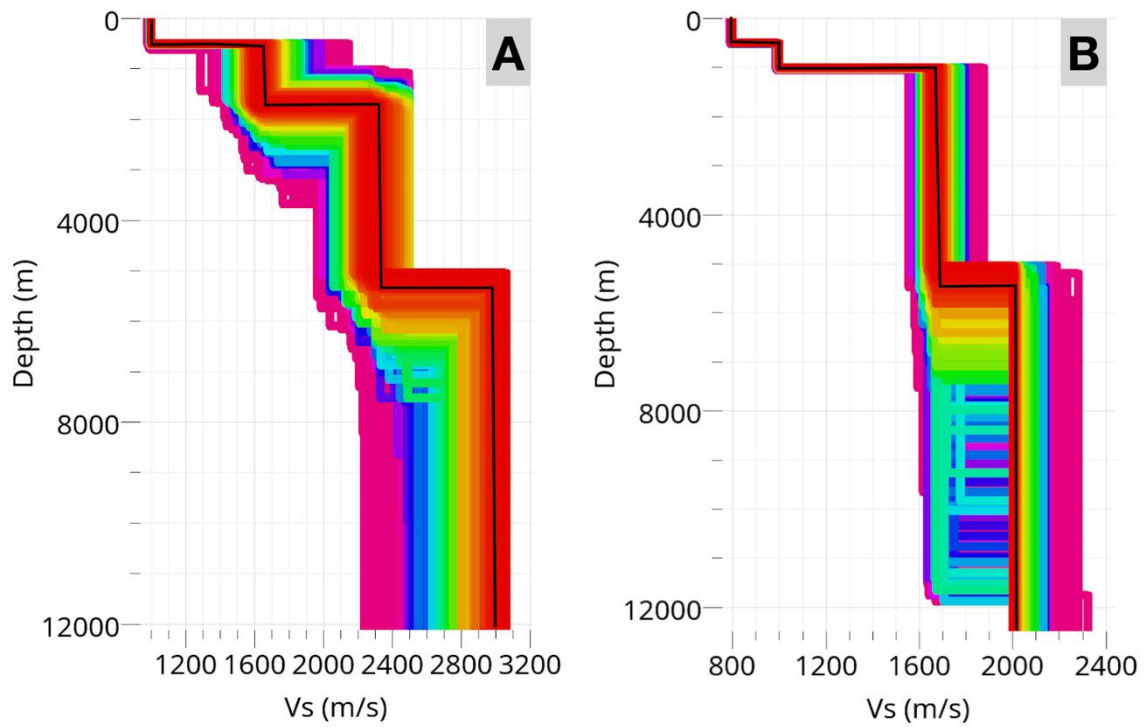

**Supplementary Figure S2:** Sample of 1-D Vs profile as a function of depth with best model indicated by black line. A. 1-D Vs profile at point -8.3; 115.3, B. 1-D Vs profile at point -8.3; 115.4.

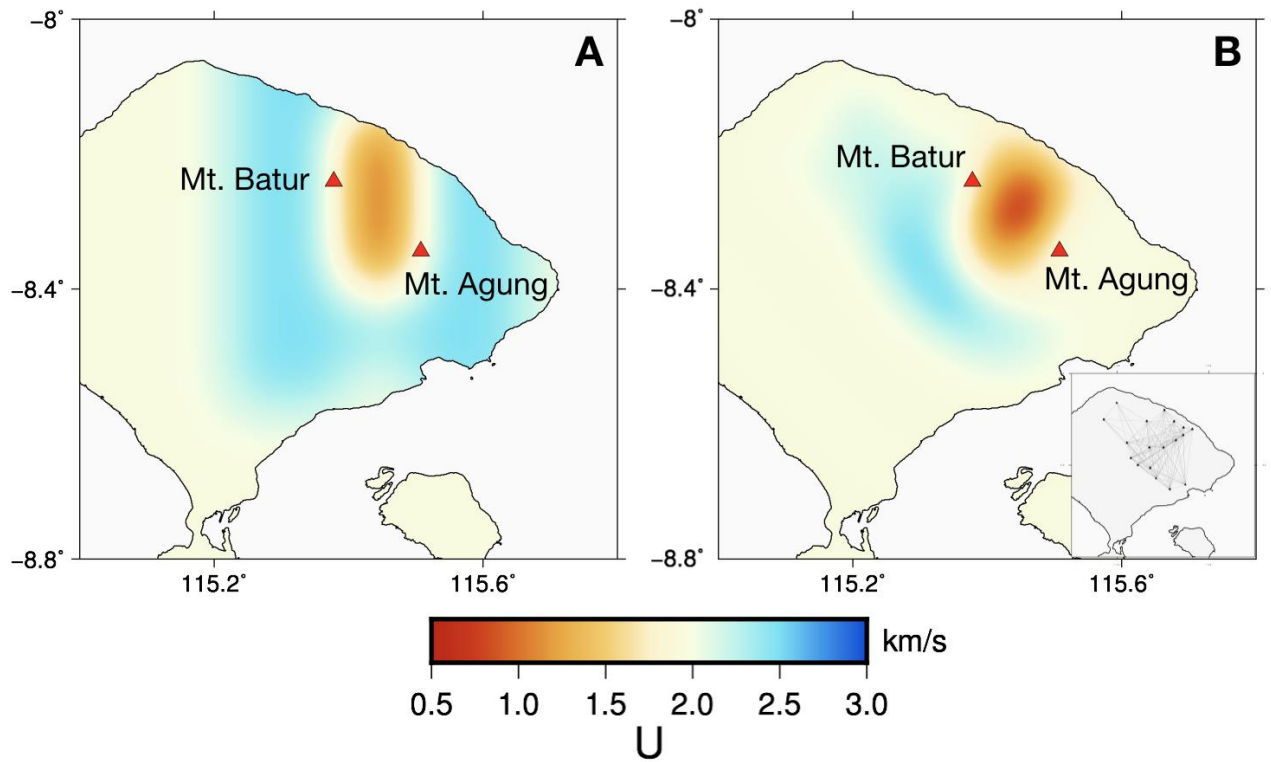

35

36 **Supplementary Figure S3:** Synthetic test of group velocity at period 5 sec, the volcanoes marked by  
 37 red triangles. (A) The initial model applied with low velocity in between Mt. Batur and Mt. Agung  
 38 and associated with dyke intrusion. (B) Recovery of group velocity of synthetic model show the low  
 39 velocity anomaly between Mt. Batur and Mt. Agung and the ray path coverage area shown in insert  
 40 map.

41

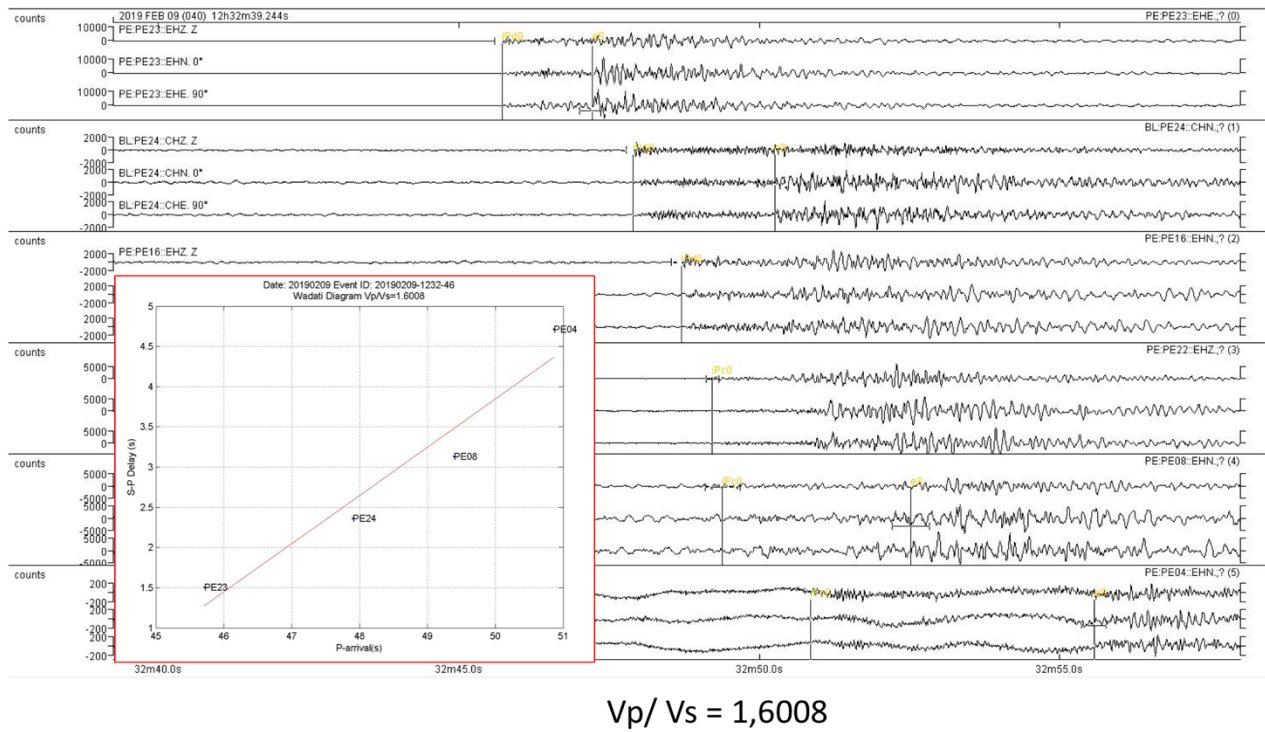

42

43 **Supplementary Figure S4:** Example of local event waveform recording by several stations that  
 44 occurred on February 9, 2019. P- and S-wave phases were carefully manually picked. The Wadati  
 45 diagram is shown in insert Figure.

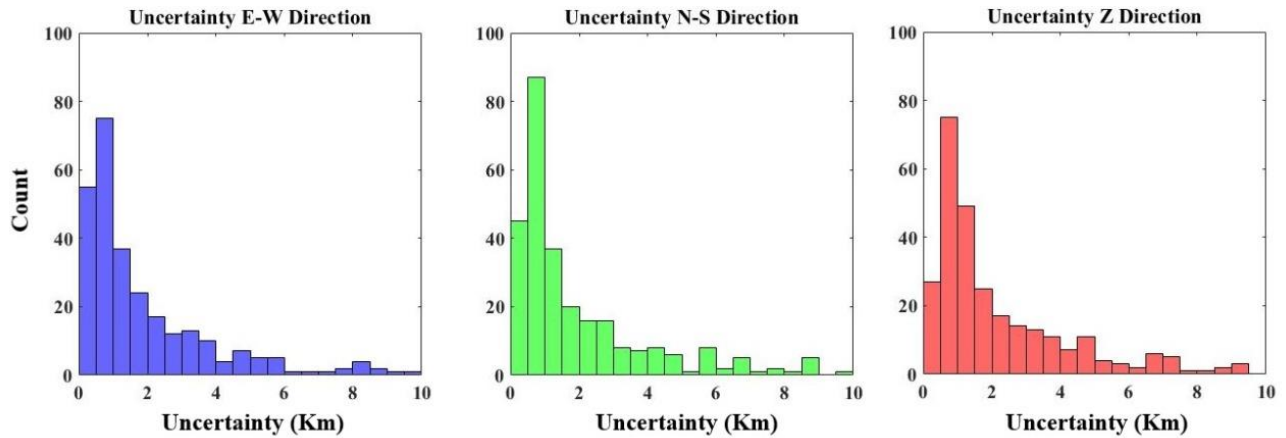

46

47 **Supplementary Figure S5:** Histogram of location uncertainty with E-W direction, N-S direction and  
 48 Z direction.
